# Supplementary material for: Geographic pattern of antibiotic resistance genes in the metagenomes of the giant panda
Source: PubMed Central journal article supplement (PMC7888472; doi:10.1111/1751-7915.13655), 2020-08-18
Supplement: MBT2-14-186-s001.pdf [file MBT2-14-186-s001.pdf]

## Supporting information

**Table S1 Information regarding the samples used in this study**

| SampleID             | Diet          | Living style | Species*          | Location*     | Citation             |
|----------------------|---------------|--------------|-------------------|---------------|----------------------|
| SRR5415505           | Bamboo-eating | Captive      | Giant panda       | Yaan          | (Guo et al., 2019)   |
| SRR5130540           | Bamboo-eating | Captive      | Giant panda       | Yaan          | (Guo et al., 2019)   |
| SRR5415504           | Bamboo-eating | Captive      | Giant panda       | Yaan          | (Guo et al., 2019)   |
| SRR5150002           | Bamboo-eating | Captive      | Giant panda       | Yaan          | (Guo et al., 2019)   |
| SRR5149981           | Bamboo-eating | Captive      | Giant panda       | Yaan          | (Guo et al., 2019)   |
| SRR5149936           | Bamboo-eating | Captive      | Giant panda       | Yaan          | (Guo et al., 2019)   |
| SRR5149935           | Bamboo-eating | Captive      | Giant panda       | Yaan          | (Guo et al., 2019)   |
| SRR5149886           | Bamboo-eating | Captive      | Giant panda       | Yaan          | (Guo et al., 2019)   |
| SRR5130583           | Bamboo-eating | Captive      | Giant panda       | Yaan          | (Guo et al., 2019)   |
| SRR5130565           | Bamboo-eating | Captive      | Giant panda       | Yaan          | (Guo et al., 2019)   |
| ERX2429102           | Bamboo-eating | Captive      | Giant panda       | Chengdu       | (Zhang et al., 2018) |
| ERX2429101           | Bamboo-eating | Captive      | Giant panda       | Chengdu       | (Zhang et al., 2018) |
| ERX2429100           | Bamboo-eating | Captive      | Giant panda       | Chengdu       | (Zhang et al., 2018) |
| ERX2429099           | Bamboo-eating | Captive      | Giant panda       | Chengdu       | (Zhang et al., 2018) |
| ERX2429098           | Bamboo-eating | Captive      | Giant panda       | Chengdu       | (Zhang et al., 2018) |
| ERX2429087           | Bamboo-eating | Captive      | Giant panda       | Chengdu       | (Zhang et al., 2018) |
| ERX2333382           | Bamboo-eating | Captive      | Giant panda       | Chengdu       | (Zhang et al., 2018) |
| SAMC011136           | Bamboo-eating | Wild         | Giant panda       | Qinling       | (Wu et al., 2017)    |
| SAMC011114           | Bamboo-eating | Wild         | Giant panda       | Qinling       | (Wu et al., 2017)    |
| SAMC011133           | Bamboo-eating | Wild         | Giant panda       | Qinling       | (Wu et al., 2017)    |
| SAMC011132           | Bamboo-eating | Wild         | Giant panda       | Qinling       | (Wu et al., 2017)    |
| SAMC011131           | Bamboo-eating | Wild         | Giant panda       | Qinling       | (Wu et al., 2017)    |
| SAMC011127           | Bamboo-eating | Wild         | Giant panda       | Qinling       | (Wu et al., 2017)    |
| SAMC011121           | Bamboo-eating | Wild         | Giant panda       | Qinling       | (Wu et al., 2017)    |
| SAMC011118           | Bamboo-eating | Wild         | Giant panda       | Qinling       | (Wu et al., 2017)    |
| SAMC011115           | Bamboo-eating | Wild         | Giant panda       | Qinling       | (Wu et al., 2017)    |
| SRR5149961           | Bamboo-eating | Wild         | Giant panda       | Qionglai      | (Guo et al., 2019)   |
| SRR5149913           | Bamboo-eating | Wild         | Giant panda       | Qionglai      | (Guo et al., 2019)   |
| SRR5149902           | Bamboo-eating | Wild         | Giant panda       | Qionglai      | (Guo et al., 2019)   |
| SRR5149862           | Bamboo-eating | Wild         | Giant panda       | Qionglai      | (Guo et al., 2019)   |
| SRR5130600           | Bamboo-eating | Wild         | Giant panda       | Qionglai      | (Guo et al., 2019)   |
| SRR5130560           | Bamboo-eating | Wild         | Giant panda       | Qionglai      | (Guo et al., 2019)   |
| SRR5130537           | Bamboo-eating | Wild         | Giant panda       | Qionglai      | (Guo et al., 2019)   |
| 20140128-zx-F03      | Bamboo-eating | Wild         | Giant panda       | Xiaoxiangling | (Zhu et al., 2018b)  |
| 20131124-ZX-F03      | Bamboo-eating | Wild         | Giant panda       | Xiaoxiangling | (Zhu et al., 2018b)  |
| 50                   | Bamboo-eating | Wild         | Giant panda       | Xiaoxiangling | (Zhu et al., 2018b)  |
| 34                   | Bamboo-eating | Wild         | Giant panda       | Xiaoxiangling | (Zhu et al., 2018b)  |
| 31                   | Bamboo-eating | Wild         | Giant panda       | Xiaoxiangling | (Zhu et al., 2018b)  |
| 9                    | Bamboo-eating | Wild         | Giant panda       | Xiaoxiangling | (Zhu et al., 2018b)  |
| TT2                  | Bamboo-eating | Wild         | Giant panda       | Xiaoxiangling | (Zhu et al., 2018b)  |
| 19                   | Bamboo-eating | Wild         | Giant panda       | Xiaoxiangling | (Zhu et al., 2018b)  |
| TT1                  | Bamboo-eating | Wild         | Giant panda       | Xiaoxiangling | (Zhu et al., 2018b)  |
| LZP                  | Bamboo-eating | Wild         | Giant panda       | Xiaoxiangling | (Zhu et al., 2018b)  |
| LX3                  | Bamboo-eating | Wild         | Giant panda       | Xiaoxiangling | (Zhu et al., 2018b)  |
| CDXM40               | Bamboo-eating | Wild         | Giant panda       | Xiaoxiangling | (Zhu et al., 2018b)  |
| CDXM39               | Bamboo-eating | Wild         | Giant panda       | Xiaoxiangling | (Zhu et al., 2018b)  |
| CDXM27               | Bamboo-eating | Wild         | Giant panda       | Xiaoxiangling | (Zhu et al., 2018b)  |
| CDXM18               | Bamboo-eating | Wild         | Giant panda       | Xiaoxiangling | (Zhu et al., 2018b)  |
| 23                   | Bamboo-eating | Wild         | Giant panda       | Xiaoxiangling | (Zhu et al., 2018b)  |
| C2                   | Bamboo-eating | Wild         | Red panda         | Xiaoxiangling | (Zhu et al., 2018b)  |
| C18                  | Bamboo-eating | Wild         | Red panda         | Xiaoxiangling | (Zhu et al., 2018b)  |
| C14                  | Bamboo-eating | Wild         | Red panda         | Xiaoxiangling | (Zhu et al., 2018b)  |
| B2-4                 | Bamboo-eating | Wild         | Red panda         | Xiaoxiangling | (Zhu et al., 2018b)  |
| B1-2                 | Bamboo-eating | Wild         | Red panda         | Xiaoxiangling | (Zhu et al., 2018b)  |
| A4                   | Bamboo-eating | Wild         | Red panda         | Xiaoxiangling | (Zhu et al., 2018b)  |
| MJ22813045835_PY     | HE            | Captive      | Argali            | Beijing Zoo   | (Zhu et al., 2018a)  |
| MJ22813045835_BTCBY  | HE            | Captive      | Hoolock.gibbon    | Beijing Zoo   | (Zhu et al., 2018a)  |
| MJ22813045835_BJZML7 | HE            | Captive      | Père David's deer | Beijing Zoo   | (Zhu et al., 2018a)  |
| LN                   | HE            | Captive      | Takin             | Beijing Zoo   | (Zhu et al., 2018a)  |

|                       |    |         |                         |                               |                     |
|-----------------------|----|---------|-------------------------|-------------------------------|---------------------|
| MJ22813045835_MHL     | HE | Captive | Sika.deer               | Beijing Zoo                   | (Zhu et al., 2018a) |
| MJ22813045835_MGYL    | HE | Captive | Onager                  | Beijing Zoo                   | (Zhu et al., 2018a) |
| MJ22813045835_MAL     | HE | Captive | Red.deer                | Beijing Zoo                   | (Zhu et al., 2018a) |
| MJ22813045835_HYH     | HE | Captive | Francois's Langur       | Beijing Zoo                   | (Zhu et al., 2018a) |
| MJ22813045835_HJ      | HE | Captive | Hairy.fronted.muntjac   | Beijing Zoo                   | (Zhu et al., 2018a) |
| MJ22813045835_EHL     | HE | Captive | Goitered.gazelle        | Beijing Zoo                   | (Zhu et al., 2018a) |
| MJ22813045835_DJSH    | HE | Captive | Black.snub.nosed.monkey | Beijing Zoo                   | (Zhu et al., 2018a) |
| MJ22813045835_BXCBY   | HE | Captive | white.cheeked.gibbon    | Beijing Zoo                   | (Zhu et al., 2018a) |
| NM                    | CA | Captive | Caracal                 | Beijing Zoo                   | (Zhu et al., 2018a) |
| MJ22813045835_CH      | CA | Captive | Red.fox                 | Beijing Zoo                   | (Zhu et al., 2018a) |
| MJ22813045835_CA      | CA | Captive | Dhole                   | Beijing Zoo                   | (Zhu et al., 2018a) |
| MJ22813045835_BHB-NJ  | CA | Captive | Spotted.seal            | Nanjing Underwater World Park | (Zhu et al., 2018a) |
| LB                    | CA | Captive | Cheetah                 | Beijing Zoo                   | (Zhu et al., 2018a) |
| HN13                  | CA | Captive | Indochinese.leopard     | Beijing Zoo                   | (Zhu et al., 2018a) |
| HB                    | CA | Captive | Black.leopard           | Beijing Zoo                   | (Zhu et al., 2018a) |
| FZS                   | CA | Captive | LionBJ                  | Beijing Zoo                   | (Zhu et al., 2018a) |
| DBH                   | CA | Captive | Siberian.tiger          | Beijing Zoo                   | (Zhu et al., 2018a) |
| BXL                   | CA | Captive | Maned.wolf              | Beijing Zoo                   | (Zhu et al., 2018a) |
| MJLH                  | CA | Captive | Bengal.tiger            | Beijing Zoo                   | (Zhu et al., 2018a) |
| BLG                   | CA | Captive | Spotted.hyena           | Beijing Zoo                   | (Zhu et al., 2018a) |
| MJ22813045835_YH      | CA | Captive | Silver fox              | Beijing Zoo                   | (Zhu et al., 2018a) |
| MJ22813045835_SH      | CA | Captive | Corsac.fox              | Beijing Zoo                   | (Zhu et al., 2018a) |
| MJ22813045835_NMHB-NJ | CA | Captive | Spotted.sealNJ2         | Nanjing Underwater World Park | (Zhu et al., 2018a) |
| MJ22813045835_LH      | CA | Captive | Arctic.fox              | Beijing Zoo                   | (Zhu et al., 2018a) |
| MJ22813045835_HW2B    | CA | Captive | Jaguar                  | Beijing Zoo                   | (Zhu et al., 2018a) |
| MJ22813045835_HBHL    | CA | Captive | Black.backed.jackal     | Beijing Zoo                   | (Zhu et al., 2018a) |
| MJ22813045835_GLG     | CA | Captive | Striped hyena           | Beijing Zoo                   | (Zhu et al., 2018a) |
| ZH                    | OC | Captive | Hog.badger              | Beijing Zoo                   | (Zhu et al., 2018a) |
| MJ22813045835_MLX     | OC | Captive | Sun.bear                | Beijing Zoo                   | (Zhu et al., 2018a) |
| MJ22813045835_HX      | OC | Captive | Raccoon                 | Beijing Zoo                   | (Zhu et al., 2018a) |
| SRR5130595            | OC | Captive | Black bear              | Yaan                          | (Guo et al., 2018)  |
| SRR5130563            | OC | Captive | Black bear              | Yaan                          | (Guo et al., 2018)  |
| SRR5130533            | OC | Captive | Black bear              | Yaan                          | (Guo et al., 2018)  |
| SRR5130531            | OC | Captive | Black bear              | Yaan                          | (Guo et al., 2018)  |
| SRR5130527            | OC | Captive | Black bear              | Yaan                          | (Guo et al., 2018)  |
| MJ22813045835_ZX      | OC | Captive | Brow.bear               | Beijing Zoo                   | (Zhu et al., 2018a) |
| MJ22813045835_MX      | OC | Captive | Kinkajou                | Beijing Zoo                   | (Zhu et al., 2018a) |

\*The group analysis only included giant panda samples.

CA, meat-eating carnivorans. OC, omnivorous carnivorans. HE, herbivores. Chengdu, Chengdu giant panda Breeding center. Yaan, giant panda research center in Yaan.

**Table S2 The genera summary of the nine groups formed from these 96 metagenomes**

| Genus                                                                                               | CA (%)   | OC (%)   | Qinling (%) | Qionglai (%) | XXL (%)  | Yaan(%)  | Chengdu (%) | RPxxl (%) | HE (%)   |
|-----------------------------------------------------------------------------------------------------|----------|----------|-------------|--------------|----------|----------|-------------|-----------|----------|
| p__Proteobacteria;c__Gammaproteobacteria;o__Pseudomonadales;f__Pseudomonadaceae;g__Pseudomonas      | 0.07358  | 4.32976  | 0.01399     | 22.06394     | 43.70908 | 0.29144  | 12.32207    | 61.37176  | 0.04291  |
| p__Proteobacteria;c__Gammaproteobacteria;o__Enterobacterales;f__Enterobacteriaceae;g__Escherichia   | 2.69980  | 17.62788 | 10.08703    | 6.53788      | 5.78505  | 33.54275 | 28.12609    | 0.26900   | 0.10564  |
| p__Firmicutes;c__Clostridia;o__Clostridiales;f__Clostridiaceae;g__Clostridium                       | 4.04778  | 8.27262  | 41.62053    | 0.15433      | 16.80261 | 3.88416  | 0.11267     | 0.21159   | 6.49282  |
| p__Firmicutes;c__Bacilli;o__Lactobacillales;f__Streptococcaceae;g__Streptococcus                    | 0.21572  | 15.89632 | 12.32702    | 0.31717      | 6.99485  | 26.81897 | 0.94633     | 8.84151   | 0.18720  |
| p__Bacteroidetes;c__Bacteroidia;o__Bacteroidales;f__Bacteroidaceae;g__Bacteroides                   | 30.05432 | 0.04400  | 0.03108     | 0.03909      | 0.01020  | 0.31254  | 0.01657     | 0.00390   | 10.26886 |
| p__Proteobacteria;c__Gammaproteobacteria;o__Enterobacterales;f__Enterobacteriaceae;Unclassified     | 0.61820  | 4.36630  | 2.14696     | 1.12846      | 1.07172  | 6.55898  | 9.86128     | 0.03478   | 0.00170  |
| p__Firmicutes;c__Bacilli;o__Lactobacillales;f__Lactobacillaceae;g__Lactobacillus                    | 0.16674  | 4.68659  | 2.30370     | 0.02553      | 0.13552  | 3.26846  | 13.50225    | 0.05892   | 0.12182  |
| p__Proteobacteria;Unclassified;Unclassified;Unclassified;Unclassified                               | 0.76935  | 4.12680  | 1.22728     | 0.79798      | 0.98647  | 7.11008  | 4.04970     | 0.08788   | 0.00116  |
| p__Proteobacteria;c__Gammaproteobacteria;o__Enterobacterales;f__Enterobacteriaceae;g__Klebsiella    | 0.27852  | 0.89783  | 0.34717     | 0.34818      | 0.24747  | 1.03669  | 13.28608    | 0.04107   | 0.07713  |
| p__Bacteroidetes;c__Bacteroidia;o__Bacteroidales;f__Prevotellaceae;g__Prevotella                    | 5.43477  | 0.00536  | 0.00836     | 0.01047      | 0.00499  | 0.00146  | 0.00016     | 0.00069   | 10.90080 |
| p__Proteobacteria;c__Gammaproteobacteria;o__Enterobacterales;f__Yersiniaceae;g__Yersinia            | 0.00140  | 0.14457  | 2.70325     | 6.26697      | 5.08232  | 0.55837  | 0.03375     | 0.37640   | 0.00114  |
| p__Firmicutes;c__norank;o__norank;f__norank;g__norank                                               | 1.88147  | 0.02723  | 0.06363     | 0.04409      | 0.00808  | 0.01148  | 0.00445     | 0.00081   | 9.63561  |
| p__Proteobacteria;c__Betaproteobacteria;o__Burkholderiales;f__Oxalobacteraceae;g__Janthinobacterium | 0.00623  | 0.27698  | 0.00000     | 1.57858      | 0.68921  | 0.06270  | 0.00018     | 8.82555   | 0.00034  |
| p__Firmicutes;c__Erysipelotrichia;o__Erysipelotrichales;f__Erysipelotrichaceae;g__Turicibacter      | 0.01117  | 0.37365  | 9.03083     | 0.00436      | 0.43724  | 0.20080  | 0.00001     | 0.00880   | 0.01634  |
| p__Firmicutes;c__Clostridia;o__Clostridiales;f__Lachnospiraceae;g__Blautia                          | 7.49702  | 0.28244  | 0.06475     | 0.00415      | 0.09126  | 0.02766  | 0.04678     | 0.00218   | 0.96182  |
| p__Proteobacteria;c__Gammaproteobacteria;o__Enterobacterales;f__Hafniaceae;g__Hafnia                | 0.00086  | 0.04227  | 0.29978     | 6.53067      | 1.84538  | 0.02450  | 0.00371     | 0.02067   | 0.00046  |
| p__Firmicutes;c__Bacilli;o__Lactobacillales;f__Enterococcaceae;g__Enterococcus                      | 0.17529  | 1.20347  | 0.37748     | 0.00687      | 0.17831  | 0.57880  | 0.62138     | 5.37606   | 0.09168  |
| p__Bacteroidetes;c__Flavobacteriia;o__Flavobacteriales;f__Flavobacteriaceae;g__Flavobacterium       | 0.00446  | 0.23696  | 0.00022     | 6.63691      | 1.02123  | 0.05485  | 0.00005     | 0.59172   | 0.04916  |
| p__Fusobacteria;c__Fusobacteriia;o__Fusobacteriales;f__Fusobacteriaceae;g__Fusobacterium            | 7.21399  | 0.42385  | 0.01395     | 0.00188      | 0.00441  | 0.00486  | 0.00646     | 0.00126   | 0.14064  |
| p__Proteobacteria;c__Gammaproteobacteria;o__Enterobacterales;f__Enterobacteriaceae;g__Shigella      | 0.20161  | 1.15527  | 0.44747     | 0.52982      | 0.29430  | 2.42339  | 2.18226     | 0.04787   | 0.08648  |
| p__Firmicutes;c__Bacilli;o__Lactobacillales;f__Streptococcaceae;g__Lactococcus                      | 0.01076  | 0.15741  | 6.76255     | 0.00042      | 0.01228  | 0.05028  | 0.06204     | 0.12692   | 0.02992  |
| p__Proteobacteria;c__Gammaproteobacteria;o__Enterobacterales;f__Enterobacteriaceae;g__Citrobacter   | 0.07084  | 3.46651  | 0.48986     | 0.21308      | 0.13315  | 0.58277  | 1.15356     | 0.00650   | 0.00366  |
| p__Bacteroidetes;c__Sphingobacteriia;o__Sphingobacteriales;f__Sphingobacteriaceae;g__Pedobacter     | 0.00187  | 0.07399  | 0.00001     | 0.97192      | 2.74604  | 0.21521  | 0.00003     | 1.91878   | 0.01851  |
| p__Bacteroidetes;c__Bacteroidia;o__Bacteroidales;f__Rikenellaceae;g__Alistipes                      | 0.45549  | 0.00163  | 0.00012     | 0.00967      | 0.00011  | 0.00007  | 0.00009     | 0.00005   | 5.38200  |
| Unclassified;Unclassified;Unclassified;Unclassified;Unclassified                                    | 0.87116  | 0.60996  | 0.36452     | 0.17680      | 0.25793  | 1.21143  | 1.20343     | 0.09052   | 0.35486  |
| p__Proteobacteria;c__Alphaproteobacteria;o__Rhizobiales;f__Bradyrhizobiaceae;g__Bradyrhizobium      | 0.00026  | 0.35056  | 0.00000     | 4.73171      | 0.00445  | 0.00335  | 0.00007     | 0.00575   | 0.00245  |

|                                                                                                        |         |         |         |         |         |         |         |         |         |
|--------------------------------------------------------------------------------------------------------|---------|---------|---------|---------|---------|---------|---------|---------|---------|
| p__Proteobacteria;c__Betaproteobacteria;o__Burkholderiales;f__Oxalobacteraceae;g__Duganella            | 0.00013 | 1.94987 | 0.00000 | 0.97843 | 0.32934 | 0.03454 | 0.00006 | 1.43057 | 0.00056 |
| p__norank;c__norank;o__norank;f__norank;g__norank                                                      | 1.29876 | 0.18030 | 0.03110 | 0.25601 | 0.05565 | 0.17618 | 0.07021 | 0.05378 | 2.52936 |
| p__Proteobacteria;c__Gammaproteobacteria;o__Enterobacterales;Unclassified;Unclassified                 | 0.01547 | 0.24204 | 0.11726 | 0.17571 | 0.08317 | 0.29736 | 3.59752 | 0.00549 | 0.00011 |
| p__Fusobacteria;c__Fusobacteriia;o__Fusobacteriales;f__Fusobacteriaceae;g__Cetobacterium               | 0.73820 | 3.63055 | 0.00022 | 0.00002 | 0.00003 | 0.02099 | 0.00000 | 0.00000 | 0.00216 |
| p__Firmicutes;c__Clostridia;o__Clostridiales;f__norank;g__norank                                       | 0.49464 | 0.03642 | 0.06391 | 0.02948 | 0.12797 | 0.05631 | 0.00372 | 0.01141 | 3.53764 |
| p__Proteobacteria;c__Betaproteobacteria;o__Burkholderiales;f__Sutterellaceae;g__Sutterella             | 4.16008 | 0.00398 | 0.00001 | 0.00896 | 0.00203 | 0.00122 | 0.00000 | 0.02095 | 0.05238 |
| p__Firmicutes;c__Clostridia;o__Clostridiales;f__Ruminococcaceae;g__Ruminococcus                        | 0.86877 | 0.01844 | 0.07085 | 0.00924 | 0.05372 | 0.21776 | 0.01976 | 0.01350 | 2.80809 |
| p__Proteobacteria;c__Gammaproteobacteria;o__Enterobacterales;f__Enterobacteriaceae;g__Salmonella       | 0.10744 | 0.96946 | 0.29269 | 0.51718 | 0.17102 | 1.19081 | 0.75258 | 0.00538 | 0.00540 |
| p__Proteobacteria;c__Gammaproteobacteria;o__Xanthomonadales;f__Xanthomonadaceae;g__Stenotrophomonas    | 0.00198 | 0.03510 | 0.00000 | 3.40728 | 0.11677 | 0.01450 | 0.15582 | 0.23724 | 0.00067 |
| p__Actinobacteria;c__Actinobacteria;o__Micrococcales;f__Microbacteriaceae;g__Cryobacterium             | 0.00002 | 0.00045 | 0.00001 | 0.06219 | 0.15819 | 0.00215 | 0.00001 | 3.51042 | 0.00035 |
| p__Proteobacteria;c__Gammaproteobacteria;o__norank;f__norank;g__norank                                 | 0.00040 | 2.60731 | 0.00076 | 0.61142 | 0.03426 | 0.00164 | 0.00882 | 0.04132 | 0.01482 |
| p__Firmicutes;c__Bacilli;o__Bacillales;f__Bacillaceae;g__Bacillus                                      | 0.50071 | 0.30906 | 0.90331 | 0.05963 | 0.39777 | 0.12793 | 0.22067 | 0.04188 | 0.57319 |
| p__Proteobacteria;c__Betaproteobacteria;o__Burkholderiales;f__Burkholderiaceae;g__Paraburkholderia     | 0.00533 | 2.83195 | 0.00062 | 0.23048 | 0.02335 | 0.00310 | 0.00058 | 0.02593 | 0.00112 |
| p__Proteobacteria;c__Gammaproteobacteria;o__Enterobacterales;f__Enterobacteriaceae;g__Enterobacter     | 0.03225 | 0.56077 | 0.16128 | 0.83268 | 0.21007 | 0.56431 | 0.60682 | 0.01033 | 0.00781 |
| p__Actinobacteria;c__Coriobacteriia;o__Coriobacteriales;f__Coriobacteriaceae;g__Collinsella            | 2.39884 | 0.00392 | 0.00011 | 0.00006 | 0.00050 | 0.00000 | 0.48505 | 0.00000 | 0.08219 |
| p__Firmicutes;c__Clostridia;o__Clostridiales;f__Eubacteriaceae;g__Eubacterium                          | 0.59875 | 0.03879 | 0.02446 | 0.00201 | 0.00397 | 0.03074 | 0.00311 | 0.00476 | 2.02363 |
| p__Bacteroidetes;c__Bacteroidia;o__Bacteroidales;f__norank;g__norank                                   | 0.17144 | 0.00110 | 0.00012 | 0.00357 | 0.00025 | 0.00018 | 0.00004 | 0.00008 | 2.44687 |
| p__Firmicutes;c__Clostridia;o__Clostridiales;f__Lachnospiraceae;g__norank                              | 0.92214 | 0.08113 | 0.09874 | 0.00315 | 0.06140 | 0.03156 | 0.00290 | 0.00410 | 1.40136 |
| p__Proteobacteria;c__Gammaproteobacteria;o__Enterobacterales;f__norank;g__Plesiomonas                  | 0.01270 | 2.39314 | 0.00000 | 0.00942 | 0.00068 | 0.09814 | 0.08385 | 0.00008 | 0.00024 |
| p__Proteobacteria;c__Gammaproteobacteria;o__Enterobacterales;f__Hafniaceae;Unclassified                | 0.00001 | 0.00334 | 0.10336 | 2.00611 | 0.43139 | 0.00641 | 0.00034 | 0.00401 | 0.00000 |
| p__Firmicutes;c__Clostridia;o__Clostridiales;f__Ruminococcaceae;g__norank                              | 0.16258 | 0.00716 | 0.01378 | 0.00827 | 0.03151 | 0.00200 | 0.01289 | 0.02123 | 2.17179 |
| p__Bacteroidetes;c__Bacteroidia;o__Bacteroidales;Unclassified;Unclassified                             | 1.78157 | 0.00100 | 0.00000 | 0.00135 | 0.00016 | 0.00656 | 0.00051 | 0.00005 | 0.61905 |
| p__Proteobacteria;c__Gammaproteobacteria;o__Enterobacterales;f__Yersiniaceae;g__Rahnella               | 0.00045 | 0.84617 | 0.19703 | 0.51020 | 0.43550 | 0.06944 | 0.00289 | 0.23719 | 0.00003 |
| p__Firmicutes;c__Bacilli;o__Bacillales;f__Staphylococcaceae;g__Staphylococcus                          | 0.81787 | 0.42949 | 0.03433 | 0.00220 | 0.06748 | 0.07058 | 0.23725 | 0.03397 | 0.56255 |
| p__Proteobacteria;c__Gammaproteobacteria;o__Enterobacterales;f__Yersiniaceae;g__Serratia               | 0.00966 | 0.18768 | 0.16166 | 1.25080 | 0.25028 | 0.24670 | 0.07909 | 0.03970 | 0.00073 |
| p__Proteobacteria;c__Betaproteobacteria;o__Burkholderiales;f__Comamonadaceae;g__Comamonas              | 0.03298 | 0.03159 | 0.00002 | 1.86596 | 0.05067 | 0.01547 | 0.18139 | 0.04523 | 0.00203 |
| p__Bacteroidetes;c__Bacteroidia;o__Bacteroidales;f__Tannerellaceae;g__Parabacteroides                  | 1.02646 | 0.00860 | 0.00078 | 0.00561 | 0.00369 | 0.00447 | 0.00041 | 0.00114 | 1.09934 |
| p__Proteobacteria;c__Betaproteobacteria;o__Burkholderiales;f__Alcaligenaceae;g__Achromobacter          | 0.00966 | 0.02685 | 0.00000 | 1.98370 | 0.02706 | 0.00056 | 0.00121 | 0.00787 | 0.00612 |
| p__Proteobacteria;c__Epsilonproteobacteria;o__Campylobacterales;f__Campylobacteraceae;g__Campylobacter | 0.60123 | 0.00970 | 0.05813 | 0.00777 | 0.05728 | 0.70218 | 0.46688 | 0.00280 | 0.05691 |

|                                                                                                       |         |         |         |         |         |         |         |         |         |
|-------------------------------------------------------------------------------------------------------|---------|---------|---------|---------|---------|---------|---------|---------|---------|
| p__Firmicutes;c__Clostridia;o__Clostridiales;Unclassified;Unclassified                                | 0.70187 | 0.04687 | 0.12773 | 0.00397 | 0.16039 | 0.08089 | 0.02149 | 0.00278 | 0.73493 |
| p__Firmicutes;c__Bacilli;o__Bacillales;f__Bacillaceae;g__Lysinibacillus                               | 0.00338 | 0.00547 | 0.17259 | 0.42094 | 1.18935 | 0.00863 | 0.00001 | 0.01938 | 0.05961 |
| p__Firmicutes;c__Clostridia;o__Clostridiales;f__Oscillospiraceae;g__Oscillibacter                     | 0.38321 | 0.00385 | 0.00042 | 0.01964 | 0.00010 | 0.00015 | 0.00019 | 0.00002 | 1.47092 |
| p__Firmicutes;c__Negativicutes;o__Selenomonadales;f__Selenomonadaceae;g__Megamonas                    | 1.80513 | 0.00969 | 0.04329 | 0.00091 | 0.00177 | 0.00115 | 0.00024 | 0.00008 | 0.01477 |
| p__Proteobacteria;c__Alphaproteobacteria;o__Sphingomonadales;f__Sphingomonadaceae;g__Novosphingobium  | 0.00170 | 1.22727 | 0.00000 | 0.55795 | 0.00475 | 0.00165 | 0.00000 | 0.00181 | 0.00609 |
| p__Firmicutes;c__Negativicutes;o__Veillonellales;f__Veillonellaceae;g__Megasphaera                    | 0.02356 | 0.00146 | 0.00019 | 0.00065 | 0.02024 | 0.00248 | 1.60335 | 0.00001 | 0.08902 |
| p__Firmicutes;c__Clostridia;o__Clostridiales;f__Ruminococcaceae;g__Faecalibacterium                   | 0.30162 | 0.02311 | 0.01198 | 0.01735 | 0.01466 | 0.02139 | 0.00108 | 0.00001 | 1.32803 |
| p__Firmicutes;c__Negativicutes;o__Acidaminococcales;f__Acidaminococcaceae;g__Phascolarctobacterium    | 1.00398 | 0.00089 | 0.00041 | 0.00155 | 0.00001 | 0.00006 | 0.00016 | 0.00020 | 0.70349 |
| p__Proteobacteria;c__Gammaproteobacteria;o__Enterobacteriales;f__Enterobacteriaceae;g__Lelliottia     | 0.00210 | 0.04918 | 0.00511 | 1.36528 | 0.17802 | 0.02687 | 0.01727 | 0.00165 | 0.00003 |
| p__Firmicutes;c__Clostridia;o__Clostridiales;f__Lachnospiraceae;g__Lachnoclostridium                  | 0.68971 | 0.02187 | 0.08243 | 0.00250 | 0.04209 | 0.02565 | 0.01856 | 0.00014 | 0.72506 |
| p__Proteobacteria;c__Gammaproteobacteria;o__Pasteurellales;f__Pasteurellaceae;g__Actinobacillus       | 0.00278 | 0.00125 | 0.10291 | 0.00091 | 0.00454 | 1.48070 | 0.00042 | 0.00095 | 0.00196 |
| p__Proteobacteria;c__Deltaproteobacteria;o__Myxococcales;f__norank;g__norank                          | 0.00001 | 0.01121 | 0.00000 | 1.55528 | 0.00008 | 0.00048 | 0.00000 | 0.00013 | 0.00074 |
| p__Fibrobacteres;c__Fibrobacteria;o__Fibrobacteriales;f__Fibrobacteraceae;g__Fibrobacter              | 0.03118 | 0.00254 | 0.00017 | 0.00292 | 0.00026 | 0.00001 | 0.00000 | 0.00000 | 1.39749 |
| p__Firmicutes;c__Clostridia;o__Clostridiales;f__Lachnospiraceae;g__Roseburia                          | 0.38363 | 0.00623 | 0.01354 | 0.00119 | 0.00237 | 0.01238 | 0.00091 | 0.00032 | 0.99113 |
| p__Bacteroidetes;c__Sphingobacteriia;o__Sphingobacteriales;f__Sphingobacteriaceae;g__Sphingobacterium | 0.00114 | 0.00121 | 0.00005 | 0.64173 | 0.62943 | 0.03351 | 0.00454 | 0.02977 | 0.01635 |
| p__Proteobacteria;c__Betaproteobacteria;o__Burkholderiales;f__Comamonadaceae;g__Acidovorax            | 0.00224 | 0.05552 | 0.00004 | 1.15303 | 0.05700 | 0.00914 | 0.00667 | 0.06052 | 0.00135 |
| p__Firmicutes;c__Clostridia;o__Clostridiales;f__Lachnospiraceae;g__Coproccoccus                       | 0.84063 | 0.02212 | 0.01981 | 0.00221 | 0.05445 | 0.01759 | 0.00371 | 0.02667 | 0.35502 |
| p__Proteobacteria;c__Gammaproteobacteria;o__Pseudomonadales;f__Moraxellaceae;g__Psychrobacter         | 0.01609 | 1.27250 | 0.00028 | 0.00047 | 0.00220 | 0.00991 | 0.03249 | 0.00057 | 0.00242 |
| p__Actinobacteria;c__Actinobacteria;o__Bifidobacteriales;f__Bifidobacteriaceae;g__Bifidobacterium     | 0.04613 | 0.97585 | 0.00468 | 0.01861 | 0.00180 | 0.01363 | 0.21769 | 0.00045 | 0.05568 |
| p__Chlamydiae;c__Chlamydia;o__Chlamydiales;f__Chlamydiaceae;g__Chlamydia                              | 0.29085 | 0.08670 | 0.03876 | 0.00630 | 0.02617 | 0.01056 | 0.00450 | 0.73270 | 0.13347 |
| p__Proteobacteria;c__Betaproteobacteria;o__Burkholderiales;f__Comamonadaceae;g__Variovorax            | 0.00068 | 0.09321 | 0.00000 | 0.85223 | 0.07143 | 0.00547 | 0.00172 | 0.27018 | 0.00117 |
| p__Spirochaetes;c__Spirochaetia;o__Spirochaetales;f__Spirochaetaceae;g__Treponema                     | 0.00906 | 0.00258 | 0.00435 | 0.00354 | 0.00248 | 0.00067 | 0.00010 | 0.00065 | 1.23085 |
| p__Proteobacteria;c__Gammaproteobacteria;o__Enterobacteriales;f__Morganellaceae;g__Morganella         | 0.00070 | 0.00429 | 0.00639 | 0.02038 | 0.00815 | 1.03209 | 0.11064 | 0.00059 | 0.00010 |
| p__Firmicutes;c__Clostridia;o__Clostridiales;f__Peptostreptococcaceae;g__Clostridioides               | 0.27861 | 0.22666 | 0.30699 | 0.00637 | 0.16703 | 0.05724 | 0.00216 | 0.00433 | 0.12835 |
| p__Proteobacteria;c__Gammaproteobacteria;o__Pseudomonadales;f__Moraxellaceae;g__Acinetobacter         | 0.09626 | 0.09890 | 0.08169 | 0.44399 | 0.20899 | 0.10928 | 0.00623 | 0.02552 | 0.06385 |
| p__Bacteroidetes;c__norank;o__norank;f__norank;g__norank                                              | 0.03332 | 0.00092 | 0.00009 | 0.02986 | 0.00953 | 0.00046 | 0.00015 | 0.00294 | 0.96946 |
| p__Proteobacteria;c__Betaproteobacteria;o__Neisseriales;f__Neisseriaceae;g__Neisseria                 | 0.62469 | 0.00334 | 0.01756 | 0.00602 | 0.01675 | 0.11573 | 0.21465 | 0.00706 | 0.00420 |
| p__Proteobacteria;c__Epsilonproteobacteria;o__Campylobacteriales;f__Helicobacteraceae;g__Helicobacter | 0.17503 | 0.29319 | 0.15869 | 0.00179 | 0.10141 | 0.05577 | 0.07747 | 0.00081 | 0.14330 |
| p__Firmicutes;c__Bacilli;o__Lactobacillales;f__Carnobacteriaceae;g__Carnobacterium                    | 0.00159 | 0.01247 | 0.02900 | 0.00358 | 0.04189 | 0.00444 | 0.00041 | 0.90706 | 0.00337 |

|                                                                                                      |         |         |         |          |         |         |         |         |          |
|------------------------------------------------------------------------------------------------------|---------|---------|---------|----------|---------|---------|---------|---------|----------|
| p__Actinobacteria;c__Actinobacteria;o__Micrococcales;f__Micrococcaceae;g__Arthroacter                | 0.00064 | 0.00181 | 0.00009 | 0.19433  | 0.17167 | 0.01637 | 0.00035 | 0.61059 | 0.00179  |
| p__Proteobacteria;c__Alphaproteobacteria;o__Sphingomonadales;f__Sphingomonadaceae;g__Sphingomonas    | 0.00041 | 0.14195 | 0.00019 | 0.71284  | 0.02883 | 0.00267 | 0.00001 | 0.08552 | 0.00236  |
| p__Firmicutes;c__Clostridia;o__Clostridiales;f__Peptostreptococcaceae;g__Romboutsia                  | 0.05986 | 0.55338 | 0.25489 | 0.00151  | 0.05172 | 0.01882 | 0.00000 | 0.00171 | 0.02007  |
| p__Bacteroidetes;c__Bacteroidia;o__Bacteroidales;f__Muribaculaceae;g__norank                         | 0.52253 | 0.00072 | 0.00000 | 0.00121  | 0.00002 | 0.00000 | 0.00001 | 0.00003 | 0.43372  |
| p__Firmicutes;c__Clostridia;o__norank;f__norank;g__norank                                            | 0.12771 | 0.00296 | 0.01045 | 0.00818  | 0.00144 | 0.00297 | 0.00009 | 0.00014 | 0.79771  |
| p__Firmicutes;c__Clostridia;o__Clostridiales;f__Ruminococcaceae;g__Flavonifractor                    | 0.29279 | 0.00902 | 0.00590 | 0.00554  | 0.00230 | 0.01726 | 0.00165 | 0.00009 | 0.60492  |
| p__Firmicutes;c__Clostridia;o__Clostridiales;f__Ruminococcaceae;g__Anaerotruncus                     | 0.08137 | 0.01269 | 0.00875 | 0.00327  | 0.08108 | 0.01426 | 0.00068 | 0.00001 | 0.70487  |
| p__Proteobacteria;c__Gammaproteobacteria;Unclassified;Unclassified;Unclassified                      | 0.02812 | 0.28952 | 0.04872 | 0.01552  | 0.01506 | 0.17879 | 0.31464 | 0.00126 | 0.00051  |
| p__Firmicutes;c__Bacilli;o__Lactobacillales;f__Leuconostocaceae;g__Leuconostoc                       | 0.02797 | 0.44961 | 0.02882 | 0.05931  | 0.11834 | 0.00564 | 0.17167 | 0.00343 | 0.00213  |
| p__Proteobacteria;c__Gammaproteobacteria;o__Enterobacterales;f__Morganellaceae;g__Providencia        | 0.01441 | 0.14147 | 0.23624 | 0.28318  | 0.00990 | 0.09026 | 0.02697 | 0.00151 | 0.00846  |
| p__Proteobacteria;c__Betaproteobacteria;o__Burkholderiales;f__Oxalobacteraceae;g__Herbaspirillum     | 0.00017 | 0.56873 | 0.00001 | 0.17764  | 0.00752 | 0.00066 | 0.00022 | 0.04216 | 0.00102  |
| p__Firmicutes;c__Clostridia;o__Clostridiales;f__Lachnospiraceae;Unclassified                         | 0.53268 | 0.00875 | 0.00602 | 0.00044  | 0.02737 | 0.00066 | 0.00172 | 0.00349 | 0.20403  |
| p__Firmicutes;Unclassified;Unclassified;Unclassified;Unclassified                                    | 0.28012 | 0.06673 | 0.09284 | 0.00142  | 0.01514 | 0.05424 | 0.01003 | 0.00186 | 0.25211  |
| p__Proteobacteria;c__norank;o__norank;f__norank;g__norank                                            | 0.17760 | 0.03033 | 0.00007 | 0.48578  | 0.00825 | 0.00048 | 0.00299 | 0.00448 | 0.05908  |
| p__Firmicutes;c__Clostridia;o__Clostridiales;f__Lachnospiraceae;g__Dorea                             | 0.35185 | 0.01975 | 0.01115 | 0.00288  | 0.02405 | 0.03943 | 0.01108 | 0.00263 | 0.29430  |
| p__Proteobacteria;c__Gammaproteobacteria;o__Enterobacterales;f__Enterobacteriaceae;g__Enterobacillus | 0.00179 | 0.02082 | 0.02100 | 0.58521  | 0.10965 | 0.00301 | 0.00016 | 0.00094 | 0.00051  |
| p__Firmicutes;c__Clostridia;o__Clostridiales;f__Ruminococcaceae;g__Pseudoflavonifractor              | 0.11681 | 0.00332 | 0.00112 | 0.00811  | 0.00032 | 0.17446 | 0.00018 | 0.00006 | 0.42012  |
| p__Proteobacteria;c__Betaproteobacteria;o__Burkholderiales;f__Oxalobacteraceae;g__Massilia           | 0.00025 | 0.09077 | 0.00000 | 0.11904  | 0.19125 | 0.00421 | 0.00007 | 0.31617 | 0.00257  |
| p__Proteobacteria;c__Betaproteobacteria;o__Burkholderiales;f__Comamonadaceae;g__Polaromonas          | 0.00017 | 0.02085 | 0.00006 | 0.67542  | 0.00514 | 0.00093 | 0.00094 | 0.00898 | 0.00043  |
| p__Firmicutes;c__Clostridia;o__Clostridiales;f__Lachnospiraceae;g__Cellulosilyticum                  | 0.00454 | 0.00639 | 0.61400 | 0.00072  | 0.04084 | 0.01462 | 0.00004 | 0.00049 | 0.02656  |
| p__Bacteroidetes;c__Chitinophagia;o__Chitinophagales;f__Chitinophagaceae;g__Chitinophaga             | 0.04510 | 0.52541 | 0.00016 | 0.09107  | 0.00965 | 0.00055 | 0.00001 | 0.01961 | 0.01294  |
| p__Firmicutes;c__Bacilli;o__Bacillales;f__Paenibacillaceae;g__Paenibacillus                          | 0.03087 | 0.03023 | 0.15491 | 0.10538  | 0.06513 | 0.09693 | 0.04166 | 0.03282 | 0.14504  |
| p__Bacteroidetes;c__Bacteroidia;o__Bacteroidales;f__Prevotellaceae;g__Prevotellamassilia             | 0.51951 | 0.00023 | 0.00000 | 0.00078  | 0.00000 | 0.00000 | 0.00000 | 0.00000 | 0.17796  |
| p__Proteobacteria;c__Deltaproteobacteria;o__Myxococcales;f__norank;g__Minicystis                     | 0.00000 | 0.01165 | 0.00000 | 0.67213  | 0.00007 | 0.00007 | 0.00000 | 0.00012 | 0.00015  |
| p__Firmicutes;c__Clostridia;o__Clostridiales;f__Lachnospiraceae;g__Butyrivibrio                      | 0.03838 | 0.01945 | 0.01788 | 0.00041  | 0.00158 | 0.01368 | 0.00075 | 0.00001 | 0.58289  |
| p__Firmicutes;c__Clostridia;o__Clostridiales;f__Ruminococcaceae;g__Subdoligranulum                   | 0.06611 | 0.01674 | 0.00057 | 0.00056  | 0.06246 | 0.05218 | 0.00029 | 0.00004 | 0.45823  |
| Others                                                                                               | 9.39419 | 5.87079 | 4.19087 | 14.67722 | 4.19506 | 3.22902 | 2.53110 | 2.63317 | 19.17168 |

Others, including the low mean abundance genera and unclassified groups.

CA, meat-eating carnivorans. OC, omnivorous carnivorans. HE, herbivores. Chengdu, Chengdu giant panda Breeding center. Yaan, giant panda research center in Yaan. XXL, wild Xiaoxiangliang giant panda population.

RPxxl, wild Xiaoxiangling Red panda population.



**Table S3 The mean abundance (%) of main ARG subtypes in the gut microbiome of giant pandas**

| Subtype                                                   | Wild    | Wild     | Wild | Captive | Captive |
|-----------------------------------------------------------|---------|----------|------|---------|---------|
|                                                           | Qinling | Qionglai | XXL  | YAAN    | Chengdu |
| bacitracin__bacA                                          | 21.51   | 4.29     | 7.36 | 7.33    | 2.91    |
| multidrug__multidrug_transporter                          | 5.29    | 7.21     | 6.00 | 6.97    | 2.40    |
| vancomycin__vanS                                          | 21.39   | 0.47     | 4.66 | 0.08    | 0.05    |
| multidrug__ompF                                           | 2.94    | 2.10     | 1.11 | 6.11    | 3.71    |
| unclassified__cAMP-regulatory protein                     | 1.66    | 2.55     | 3.89 | 3.21    | 2.79    |
| multidrug__omp36                                          | 2.14    | 3.14     | 1.19 | 4.24    | 3.27    |
| fosmidomycin__rosa                                        | 0.92    | 4.79     | 4.64 | 1.23    | 2.31    |
| multidrug__acrB                                           | 1.63    | 3.81     | 2.39 | 1.98    | 3.47    |
| tetracycline__tet34                                       | 2.01    | 2.27     | 0.96 | 4.41    | 2.10    |
| multidrug__multidrug_ABC_transporter                      | 0.88    | 2.01     | 8.56 | 0.12    | 0.05    |
| unclassified__DNA-binding_protein_H-NS                    | 2.03    | 2.65     | 0.89 | 2.44    | 2.39    |
| multidrug__mdtB                                           | 0.56    | 4.63     | 2.95 | 0.73    | 1.39    |
| multidrug__emrB                                           | 1.16    | 2.31     | 0.99 | 2.09    | 1.74    |
| unclassified__transcriptional regulatory protein CpxR     | 1.16    | 1.36     | 0.60 | 2.75    | 2.39    |
| cpxR                                                      | 1.16    | 1.36     | 0.60 | 2.75    | 2.39    |
| multidrug__mdtC                                           | 0.48    | 4.45     | 1.34 | 0.75    | 0.94    |
| beta-lactam__PBP-1A                                       | 2.41    | 0.03     | 1.00 | 4.36    | 0.02    |
| multidrug__ompR                                           | 0.67    | 1.95     | 1.47 | 1.16    | 1.93    |
| polymyxin__arnA                                           | 0.48    | 1.48     | 2.66 | 0.82    | 1.68    |
| multidrug__acrA                                           | 0.99    | 1.22     | 0.70 | 1.74    | 2.37    |
| multidrug__mexF                                           | 0.03    | 3.14     | 2.53 | 0.06    | 1.01    |
| multidrug__emrD                                           | 0.91    | 1.27     | 0.84 | 2.19    | 1.52    |
| multidrug__emrE                                           | 1.20    | 1.22     | 0.83 | 1.01    | 2.33    |
| multidrug__mexT                                           | 0.00    | 1.40     | 4.20 | 0.02    | 0.89    |
| multidrug__mexX                                           | 0.63    | 0.86     | 1.62 | 1.45    | 1.73    |
| fosmidomycin__rosB                                        | 0.78    | 1.77     | 0.79 | 1.43    | 1.32    |
| unclassified__truncated putative response regulator ArlR  | 2.87    | 0.06     | 1.01 | 0.77    | 1.07    |
| unclassified__bacterial regulatory protein LuxR           | 1.04    | 0.79     | 0.34 | 2.08    | 1.26    |
| unclassified__cob(I)alamin adenosyltransferase            | 0.90    | 1.44     | 0.60 | 1.32    | 1.21    |
| multidrug__mdtG                                           | 0.66    | 1.13     | 0.32 | 1.46    | 1.84    |
| multidrug__TolC                                           | 0.83    | 1.15     | 0.71 | 1.38    | 1.32    |
| multidrug__oprM                                           | 0.03    | 1.20     | 3.46 | 0.02    | 0.68    |
| multidrug__EmrB-QacA family major facilitator transporter | 0.24    | 0.37     | 0.12 | 3.47    | 0.98    |
| multidrug__mdfA                                           | 0.77    | 1.39     | 0.74 | 1.02    | 1.21    |
| kasugamycin__kasugamycin resistance protein ksgA          | 0.77    | 0.99     | 0.38 | 1.77    | 1.18    |
| macrolide-lincosamide-streptogramin__macB                 | 0.56    | 1.46     | 0.86 | 1.11    | 1.07    |
| multidrug__mdtH                                           | 0.68    | 1.07     | 0.44 | 1.23    | 1.52    |
| multidrug__mexE                                           | 0.05    | 1.35     | 2.52 | 0.05    | 0.76    |
| multidrug__mdtE                                           | 0.55    | 0.82     | 0.34 | 1.61    | 1.31    |
| multidrug__emrA                                           | 0.75    | 1.10     | 0.49 | 1.05    | 1.12    |

|                                                          |      |      |      |      |      |
|----------------------------------------------------------|------|------|------|------|------|
| multidrug__mdtK                                          | 0.55 | 1.08 | 0.64 | 1.16 | 1.02 |
| multidrug__bicyclomycin-multidrug_efflux_protein_bcr     | 0.61 | 1.01 | 0.48 | 1.06 | 1.18 |
| unclassified__DNA-binding transcriptional regulator gadX | 1.09 | 0.34 | 0.34 | 1.95 | 0.60 |
| macrolide-lincosamide-streptogramin__macA                | 0.62 | 0.79 | 0.43 | 0.98 | 1.35 |
| multidrug__mdtL                                          | 0.72 | 0.30 | 0.29 | 1.16 | 1.68 |
| multidrug__mdtM                                          | 0.45 | 0.09 | 0.20 | 1.70 | 1.66 |
| multidrug__mexA                                          | 0.00 | 0.88 | 2.27 | 0.00 | 0.83 |
| multidrug__mdtA                                          | 0.64 | 1.05 | 0.50 | 0.82 | 0.82 |
| macrolide-lincosamide-streptogramin__ermB                | 0.00 | 0.00 | 0.00 | 0.03 | 3.75 |
| beta-lactam__class C beta-lactamase                      | 0.49 | 0.44 | 0.96 | 1.14 | 0.62 |
| tetracycline__tetD                                       | 0.87 | 0.45 | 0.46 | 0.86 | 0.98 |

**Table S4 The mean abundance (%) of the dominant putative Clostridium species in the gut microbiome of giant pandas**

| Specie                               | Wild    | Wild     | Wild   | Captive | Captive |
|--------------------------------------|---------|----------|--------|---------|---------|
|                                      | Qinling | Qionglai | XXL    | Chengdu | Yaan    |
| <i>Clostridium cuniculi</i>          | 9.7014  | 0.0434   | 6.2472 | 0.0024  | 0.9893  |
| <i>Clostridium perfringens</i>       | 9.6861  | 0.0039   | 0.1806 | 0.0102  | 0.8036  |
| <i>Clostridium_unclassified</i>      | 3.7258  | 0.0112   | 1.7093 | 0.0052  | 0.1656  |
| <i>Clostridium nigeriense</i>        | 3.2707  | 0.0042   | 1.6635 | 0.0000  | 0.0755  |
| <i>Clostridium ventriculi</i>        | 0.1539  | 0.0047   | 0.0210 | 0.0002  | 0.2923  |
| <i>Clostridiales bacterium</i>       | 0.0087  | 0.0122   | 0.0953 | 0.0007  | 0.0186  |
| <i>Clostridium botulinum</i>         | 0.8725  | 0.0095   | 0.6295 | 0.0025  | 0.3902  |
| <i>Clostridium disporicum</i>        | 1.0338  | 0.0040   | 0.6611 | 0.0002  | 0.1117  |
| <i>Clostridiales_unclassified</i>    | 0.1277  | 0.0040   | 0.1604 | 0.0215  | 0.0809  |
| <i>Clostridium beijerinckii</i>      | 1.2934  | 0.0045   | 0.4179 | 0.0005  | 0.0323  |
| <i>Clostridium celatum</i>           | 0.8371  | 0.0033   | 0.5128 | 0.0002  | 0.0865  |
| <i>Clostridium saccharobutylicum</i> | 1.1347  | 0.0030   | 0.3337 | 0.0000  | 0.0083  |
| <i>Clostridium tertium</i>           | 0.8453  | 0.0026   | 0.3699 | 0.0000  | 0.0271  |
| <i>Clostridium sp. CAG:413</i>       | 0.0000  | 0.0005   | 0.0000 | 0.0001  | 0.0001  |
| <i>Clostridioides difficile</i>      | 0.2961  | 0.0063   | 0.1660 | 0.0022  | 0.0562  |
| <i>Clostridium sp. CAG:465</i>       | 0.0000  | 0.0000   | 0.0000 | 0.0000  | 0.0000  |
| <i>Clostridium sp. CAG:1219</i>      | 0.0000  | 0.0000   | 0.0000 | 0.0000  | 0.0000  |
| <i>Clostridium sp. AF17-2</i>        | 0.0000  | 0.0000   | 0.0000 | 0.0000  | 0.0000  |
| <i>Clostridium sp. AF34-13</i>       | 0.0005  | 0.0000   | 0.0001 | 0.0000  | 0.0006  |
| <i>Clostridium isatidis</i>          | 0.7773  | 0.0017   | 0.0692 | 0.0000  | 0.0048  |

**Figure S1 The distributions of dominant ARG subtypes and their abundances in the total annotated ARGs subtypes in the metagenome (visualized by Circos(Krzywinski et al., 2009)).** The length of the bars on the outer-ring represents the percentage of gut microbiome groups (genera level) in each ARGs subtype. Each gut microbiome genus was represented by a specific ribbon color, and the width of each ribbon demonstrates the abundance of each genus in the ARGs subtype. **A.** CA (meat-eating carnivorans). **B.** OC (omnivorous carnivorans). **C.** HE (herbivores). amin, aminoglycoside. bac, bacitracin. beta, beta-lactam. ble, bleomycin. chl, chloramphenicol. fosm, fosmidomycin. kas, kasugamycin. mac, macrolide-lincosamide-streptogramin. mul, multidrug. poly, polymyxin. sul, sulfonamide. tet, tetracycline. tri, trimethoprim. unc, unclassified. van, vancomycin.

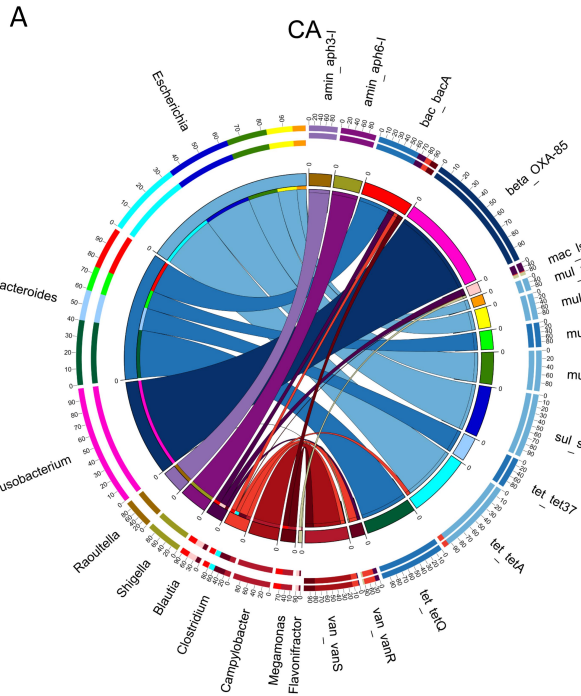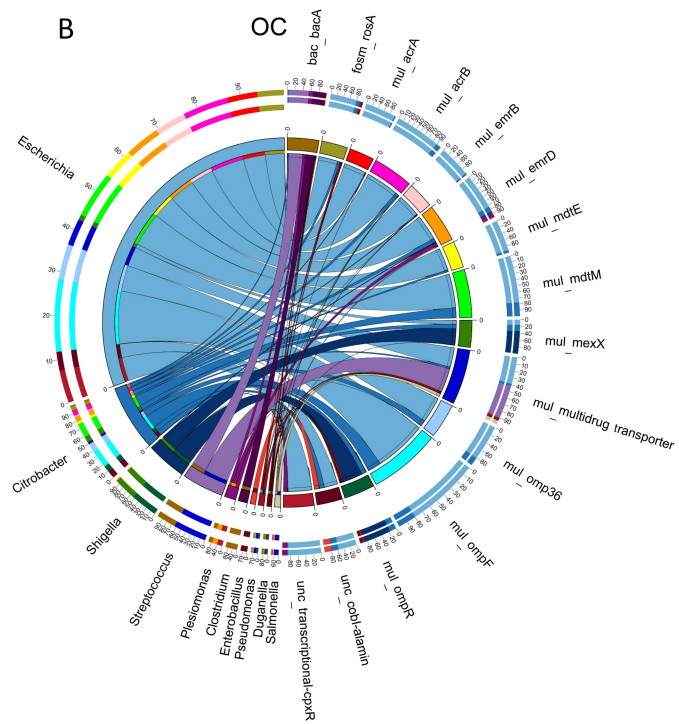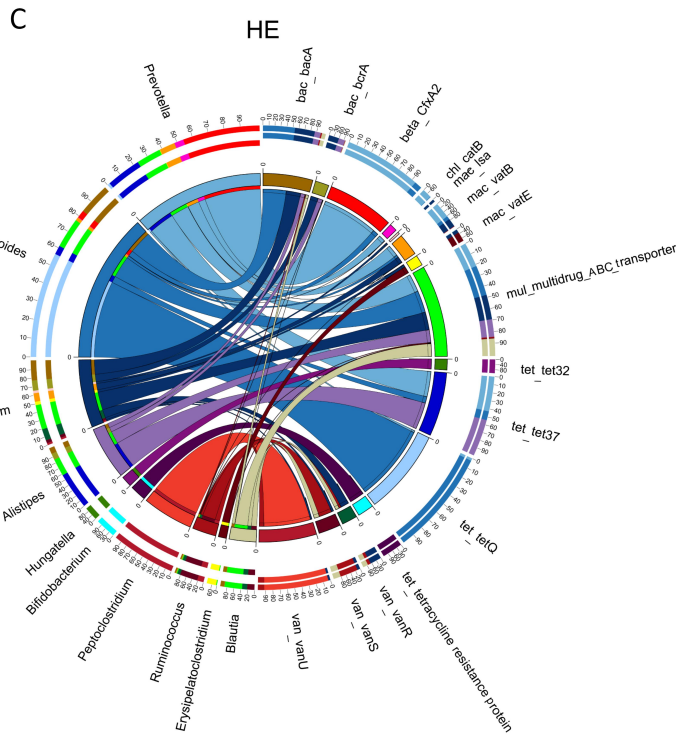

**Figure S2 The distributions of ARG subtypes and their abundances in the total annotated ARGs subtypes in giant panda and red panda metagenomes (visualized by Circos(Krzywinski et al., 2009)).** The length of the bars on the outer-ring represents the percentage of gut microbiome groups (genera level) in each ARGs subtype. Each gut microbiome genus was represented by a specific ribbon color, and the width of each ribbon demonstrates the abundance of each genus in the ARGs subtype. **A.** Qinling (wild Qinling population). **B.** Qionglai (wild Qionglai population). **C.** XXL (wild Xiaoxiangling population). **D.** Chengdu (captive Chengdu population). **E.** Yaan (captive Yaan population). **F.** RPxxl (wild red panda Xiaoxiangling population). amin, aminoglycoside. bac, bacitracin. beta, beta-lactam. ble, bleomycin. chl, chloramphenicol. fosm, fosmidomycin. kas, kasugamycin. mac, macrolide-lincosamide-streptogramin. mul, multidrug. poly, polymyxin. sul, sulfonamide. tet, tetracycline. tri, trimethoprim. unc, unclassified. van, vancomycin.



## References:

- Guo, W., Mishra, S., Wang, C., Zhang, H., Ning, R., Kong, F., Zeng, B., Zhao, J., and Li, Y. (2019). Comparative Study of Gut Microbiota in Wild and Captive Giant Pandas (*Ailuropoda melanoleuca*). *Genes* 10, 827.
- Krzywinski, M., Schein, J.E., Birol, I., Connors, J.M., Gascoyne, R.D., Horsman, D., Jones, S.J.M., and Marra, M.A. (2009). Circos: An information aesthetic for comparative genomics. *Genome Research* 19, 1639-1645.
- Wu, Q., Wang, X., Ding, Y., Hu, Y., Nie, Y., Wei, W., Ma, S., Yan, L., Zhu, L., and Wei, F. (2017). Seasonal variation in nutrient utilization shapes gut microbiome structure and function in wild giant pandas. *Proceedings of the Royal Society B: Biological Sciences* 284, 20170955.
- Zhang, W., Liu, W., Hou, R., Zhang, L., Schmitz-Esser, S., Sun, H., Xie, J., Zhang, Y., Wang, C., and Li, L. (2018). Age-associated microbiome shows the giant panda lives on hemicelluloses, not on cellulose. *The ISME journal* 12, 1319-1328.
- Zhu, L., Wu, Q., Deng, C., Zhang, M., Zhang, C., Chen, H., Lu, G., and Wei, F. (2018a). Adaptive evolution to a high purine and fat diet of carnivorans revealed by gut microbiomes and host genomes. *Environmental microbiology* 20, 1711-1722.
- Zhu, L., Yang, Z., Yao, R., Xu, L., Chen, H., Gu, X., Wu, T., and Yang, X. (2018b). Potential mechanism of detoxification of cyanide compounds by gut microbiomes of bamboo-eating pandas. *MSphere* 3.
